# Supplementary material for: Helminth Infections in Dairy Sheep Found in an Extensive Countrywide Study in Greece and Potential Predictors for Their Presence in Faecal Samples
Source: MDPI journal article supplement (doi:10.3390/microorganisms11030571), 2023-02-24
Supplement: s1 [file s1]

# Helminth Infections in Dairy Sheep Found in an Extensive Countrywide Study in Greece and Potential Predictors for Their Presence in Faecal Samples

Daphne T. Lianou, Konstantinos Arsenopoulos, Charalambia K. Michael, Vasia S. Mavrogianni, Elias Papadopoulos, and George C. Fthenakis

**Table S1.** Presence of helminths in faecal samples from individual animals in sheep flocks, in which such parasites had been found in pooled faecal samples, in Greece.

| Helminths                       | No. of farms in which helminths were found in pooled faecal samples and in which faecal samples from individual animals were also examined | No. of animals present in these farms | No. of animals sampled in these farms | No. of animals in the faecal samples of which helminths were found | Overall prevalence of recovery of helminths in samples from individual animals | Among farms median prevalence of recovery of helminths in samples from individual animals |
|---------------------------------|--------------------------------------------------------------------------------------------------------------------------------------------|---------------------------------------|---------------------------------------|--------------------------------------------------------------------|--------------------------------------------------------------------------------|-------------------------------------------------------------------------------------------|
| <i>Dicrocoelium dendriticum</i> | 13 (24.1% <sup>1</sup> )                                                                                                                   | 2,957                                 | 350                                   | 150                                                                | 42.9%                                                                          | 40.0%                                                                                     |
| <i>Fasciola hepatica</i>        | 0 (0.0%)                                                                                                                                   | 0                                     | 0                                     | 0                                                                  | 0.0%                                                                           | n/a                                                                                       |
| <i>Paramphistomum cervi</i>     | 2 (28.6%)                                                                                                                                  | 410                                   | 50                                    | 7                                                                  | 14.0%                                                                          | 21.8%                                                                                     |
| <i>Moniezia</i> spp.            | 20 (32.8%)                                                                                                                                 | 5,809                                 | 560                                   | 265                                                                | 47.3%                                                                          | 48.3%                                                                                     |
| Trichostrongylidae              | 77 (27.7%)                                                                                                                                 | 19,842                                | 2,210                                 | 1,813                                                              | 82.0%                                                                          | 93.5%                                                                                     |
| <i>Nematodirus</i> spp.         | 13 (21.3%)                                                                                                                                 | 4,573                                 | 390                                   | 183                                                                | 46.9%                                                                          | 45.0%                                                                                     |
| <i>Stronguloides papillosus</i> | 8 (34.8%)                                                                                                                                  | 3,789                                 | 250                                   | 79                                                                 | 31.6%                                                                          | 33.8%                                                                                     |
| <i>Trichuris</i> spp.           | 20 (30.8%)                                                                                                                                 | 6,027                                 | 570                                   | 173                                                                | 30.4%                                                                          | 30.0%                                                                                     |
| Lungworms                       | 18 (31.0%)                                                                                                                                 | 3,859                                 | 470                                   | 230                                                                | 48.9%                                                                          | 49.0%                                                                                     |

<sup>1</sup> figures in brackets indicate the proportion of these flocks among all those from which respective helminths had been found in pooled faecal samples.

**Table S2.** Presence of helminths in faecal samples from individual animals in sheep flocks, in which such parasites had not been found in pooled faecal samples, in Greece.

| Helminths                           | No. of farms in which<br>helminths were not found<br>in pooled faecal samples<br>and in which faecal sam-<br>ples from individual ani-<br>mals were also examined | No. of<br>animals<br>present in<br>these farms | No. of<br>animals<br>sampled in<br>these farms | No. of animals<br>in the faecal<br>samples of<br>which hel-<br>minths were<br>found | Overall<br>prevalence of<br>recovery of<br>helminths in<br>samples from in-<br>dividual animals | Among farms<br>median prevalence<br>of recovery of<br>helminths in sam-<br>ples from indivi-<br>dual animals |
|-------------------------------------|-------------------------------------------------------------------------------------------------------------------------------------------------------------------|------------------------------------------------|------------------------------------------------|-------------------------------------------------------------------------------------|-------------------------------------------------------------------------------------------------|--------------------------------------------------------------------------------------------------------------|
| <i>Dicrocoelium<br/>dendriticum</i> | 78 (28.8% <sup>1</sup> )                                                                                                                                          | 21,210                                         | 2,250                                          | 0                                                                                   | 0.0%                                                                                            | 0.0%                                                                                                         |
| <i>Fasciola<br/>hepatica</i>        | 0 (0.0%)                                                                                                                                                          | 24,167                                         | 2,600                                          | 0                                                                                   | 0.0%                                                                                            | 0.0%                                                                                                         |
| <i>Paramphistomum<br/>cervi</i>     | 89 (28.0%)                                                                                                                                                        | 23,757                                         | 2,550                                          | 0                                                                                   | 0.0%                                                                                            | 0.0%                                                                                                         |
| <i>Moniezia</i> spp.                | 71 (26.9%)                                                                                                                                                        | 18,358                                         | 2,040                                          | 0                                                                                   | 0.0%                                                                                            | 0.0%                                                                                                         |
| Trichostrongylidae                  | 14 (29.8%)                                                                                                                                                        | 4,325                                          | 390                                            | 0                                                                                   | 0.0%                                                                                            | 0.0%                                                                                                         |
| <i>Nematodirus</i> spp.             | 78 (29.5%)                                                                                                                                                        | 19,594                                         | 2,210                                          | 0                                                                                   | 0.0%                                                                                            | 0.0%                                                                                                         |
| <i>Stronguloides<br/>papillosus</i> | 83 (27.5%)                                                                                                                                                        | 20,378                                         | 2,350                                          | 0                                                                                   | 0.0%                                                                                            | 0.0%                                                                                                         |
| <i>Trichuris</i> spp.               | 71 (27.3%)                                                                                                                                                        | 18,140                                         | 2,030                                          | 0                                                                                   | 0.0%                                                                                            | 0.0%                                                                                                         |
| Lungworms                           | 73 (29.2%)                                                                                                                                                        | 20,308                                         | 2,130                                          | 0                                                                                   | 0.0%                                                                                            | 0.0%                                                                                                         |

<sup>1</sup> figures in brackets indicate the proportion of these flocks among all those from which respective helminths had not been found in pooled faecal samples.

**Table S3.** Geographical areas of Greece ( $n = 4$ ), in which administrative regions and regional units of the country were clustered, for characterizing location of 325 sheep flocks from which faecal samples were collected.

|                                                                                      |
|--------------------------------------------------------------------------------------|
| <b>Central</b>                                                                       |
| Region of Central Greece                                                             |
| Region of Thessaly                                                                   |
| From the region of Epirus: regional unit of Arta and regional unit of Preveza        |
| From the region of Western Greece: regional unit of Aetolia-Acarnania                |
| <b>Islands</b>                                                                       |
| Region of Crete                                                                      |
| Region of Ionian islands                                                             |
| Region of North Aegean                                                               |
| Region of South Aegean                                                               |
| <b>North</b>                                                                         |
| Region of Central Macedonia                                                          |
| Region of Eastern Macedonia and Thrace                                               |
| Region of Western Macedonia                                                          |
| From the region of Epirus: regional unit of Ioannina and regional unit of Thesprotia |
| <b>South</b>                                                                         |
| Region of Attica                                                                     |
| Region of Peloponnese                                                                |
| Region of Western Macedonia                                                          |
| From the region of Western Greece: regional unit of Achaia and regional unit of Elis |

---

**Figure S1.** Map of Greece indicating the geographic areas of the country ( $n = 4$ ), in which administrative regions and regional units of the country were clustered, for characterizing location of 325 sheep flocks from which faecal samples were collected (blue: Central, green: Islands, yellow: North, red: South).

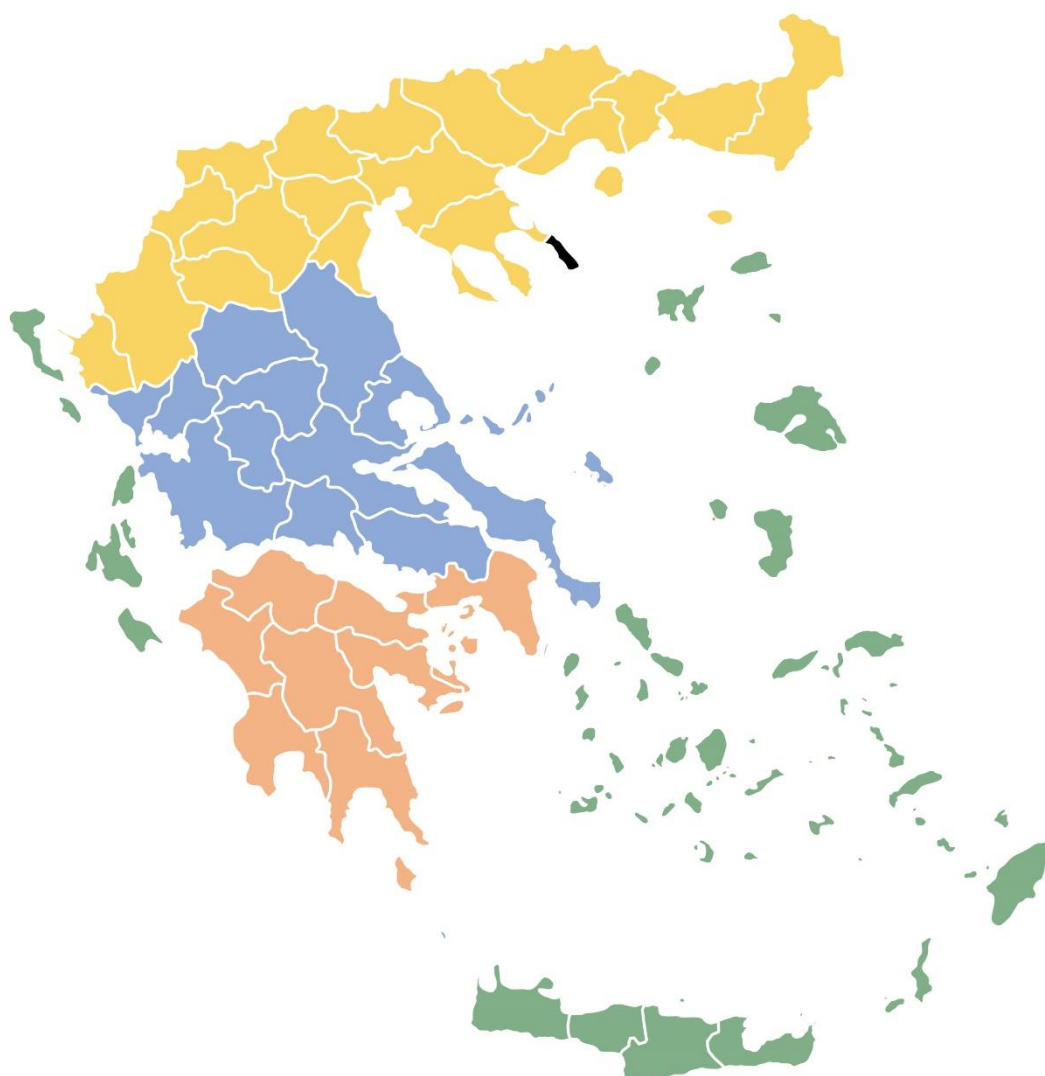

---

**Table S4.** Variables ( $n = 27$ ) evaluated for potential association with presence of helminths in faecal samples from 279 sheep flocks in Greece.

---

|                                                                                           |
|-------------------------------------------------------------------------------------------|
| Management system applied in the farm (description according to EFSA classification)      |
| Years at the location (no. of years)                                                      |
| Month into the lactation period at sampling (month)                                       |
| Availability of a main building for animals (yes / no)                                    |
| Material of the floor of the barn (soil / other)                                          |
| Availability of straw bedding (yes / no)                                                  |
| Annual frequency of removal / clean-up of the straw bedding (no. of occasions)            |
| Grazing practiced (yes / no)                                                              |
| Grazing land available to animals (acres per animal)                                      |
| No. of female animals in the farm (no.)                                                   |
| Breed of ewes (description)                                                               |
| Month of the start of the lambing season (description)                                    |
| Collaboration with a veterinarian (yes / no)                                              |
| Use of laboratory diagnostic examinations in faecal samples preventively (yes / no)       |
| Total visits made annually by veterinarians to the farm during the preceding season (no.) |
| Application of reproductive control practices in the farm (yes / no)                      |
| Nutritional modifications before the lambing period (yes / no)                            |
| Age of lamb removal from their dams (days)                                                |
| Seasonal transfer of animals to other site (yes / no)                                     |
| Annual frequency of systemic disinfections in the farm (no.)                              |
| Shearing of animals (yes / no)                                                            |
| Provision of finished feed (concentrate) to animals throughout the year (yes / no)        |
| Age of the farmer (years)                                                                 |
| Length of animal farming experience of the farmer (years)                                 |
| Education of the farmer (description)                                                     |
| Farmer by profession (yes / no)                                                           |
| Presence of working staff in the flock (yes / no)                                         |

---

**Table S5.** Details of multivariable models employed for the evaluation of the presence of helminths in faecal samples from 279 sheep flocks in Greece.

| Outcome                                                                                                      | Variables offered to the multivariable models ( <i>n</i> ) | Variables required in the final models                                                                                                                                                                                                                                  |
|--------------------------------------------------------------------------------------------------------------|------------------------------------------------------------|-------------------------------------------------------------------------------------------------------------------------------------------------------------------------------------------------------------------------------------------------------------------------|
| Presence of <i>Dicrocoelium dendriticum</i> in faecal samples                                                | 4                                                          | (a) Availability of a main building for animals, (b) Material of the floor of the barn, (c) Seasonal transfer of animals to other site                                                                                                                                  |
| High (> 300) epg counts in faecal samples                                                                    | 7                                                          | (a) Month into the lactation period at sampling, (b) No. of female animals in the farm, (c) Collaboration with a veterinarian, (d) Application of reproductive control practices in the farm, (e) Farmer by profession                                                  |
| High proportion (> 63%) of <i>Teladorsagia</i> spp. among Trichostrongylidae helminths in faecal samples     | 7                                                          | (a) Availability of straw bedding, (b) Grazing practiced, (c) Breed of ewes, (d) Nutritional modifications before the lambing period, (e) Shearing of animals, (f) Age of the farmer                                                                                    |
| High proportion (> 29%) of <i>Haemonchus contortus</i> among Trichostrongylidae helminths in faecal samples' | 9                                                          | (a) Month into the lactation period at sampling, (b) Availability of a main building for animals, (c) Availability of straw bedding, (d) Grazing land available to animals, (e) Breed of animals, (f) Seasonal transfer of animals to other site, (g) Age of the farmer |
| Presence of <i>Trichuris</i> spp. in faecal samples                                                          | 7                                                          | (a) Month of the start of the lambing season, (b) Total visits made annually by veterinarians to the farm during the preceding season, (c) Provision of finished feed (concentrate) to animals throughout the year, (d) Age of the farmer                               |
| Presence of lungworms in faecal samples                                                                      | 4                                                          | (a) Availability of a main building for animals, (b) Shearing of animals, (c) Provision of finished feed (concentrate) to animals throughout the year, (d) Farmer by profession                                                                                         |

**Table S6.** Results of parasitological examinations in pooled faecal samples from 325 sheep flocks in a countrywide investigation in Greece, in accord with the geographical area of the country and the administration of anthelmintic treatment during the two months prior to sampling.

| Untreated flocks <sup>1</sup>                                                                                    |                 |                     |             |               |                     |                |                |                       |               |               |                     |               |             |                     |               |                           |                     |  |
|------------------------------------------------------------------------------------------------------------------|-----------------|---------------------|-------------|---------------|---------------------|----------------|----------------|-----------------------|---------------|---------------|---------------------|---------------|-------------|---------------------|---------------|---------------------------|---------------------|--|
| Frequency (proportion) of flocks in which presence of parasitic elements of the following helminths was detected |                 |                     |             |               |                     |                |                |                       |               |               |                     |               |             |                     |               |                           |                     |  |
|                                                                                                                  | Dd <sup>2</sup> | Fh                  | Pc          | Mon           | Trich<br>fam        | Tel            | Hc             | Trich<br>spp.         | Chab          | Coop          | Bun                 | Nem           | Sp          | Trichur             | Lung          | epg <sup>3</sup><br>> 300 |                     |  |
| North <sup>4</sup><br>(n = 84)                                                                                   | 12<br>(14.3%)   | 0<br>(0.0%)         | 0<br>(0.0%) | 13<br>(15.5%) | 84<br>(100.0%)      | 84<br>(100.0%) | 84<br>(100.0%) | 79<br>(94.0%)         | 61<br>(72.6%) | 43<br>(51.2%) | 22<br>(26.2%)       | 28<br>(33.3%) | 6<br>(7.1%) | 19<br>(22.6%)       | 20<br>(23.8%) | 32<br>(38.1%)             |                     |  |
| Central<br>(n = 105)                                                                                             | 22<br>(21.0%)   | 1<br>(1.0%)         | 2<br>(1.9%) | 22<br>(21.0%) | 98<br>(93.3%)       | 98<br>(93.3%)  | 98<br>(93.3%)  | 91<br>(86.7%)         | 74<br>(70.5%) | 48<br>(45.7%) | 24<br>(22.9%)       | 18<br>(17.1%) | 9<br>(8.6%) | 22<br>(21.0%)       | 18<br>(17.1%) | 15<br>(14.3%)             |                     |  |
| South<br>(n = 47)                                                                                                | 6<br>(12.8%)    | 0<br>(0.0%)         | 2<br>(4.3%) | 11<br>(23.4%) | 37<br>(78.5%)       | 37<br>(78.5%)  | 37<br>(78.5%)  | 35<br>(74.4%)         | 29<br>(61.7%) | 19<br>(40.4%) | 7<br>(14.9%)        | 8<br>(17.0%)  | 3<br>(6.4%) | 12<br>(25.5%)       | 8<br>(17.0%)  | 16<br>(34.0%)             |                     |  |
| Islands<br>(n = 43)                                                                                              | 9<br>(20.9%)    | 0<br>(0.0%)         | 1<br>(2.3%) | 7<br>(16.3%)  | 42<br>(97.7%)       | 42<br>(97.7%)  | 42<br>(97.7%)  | 38<br>(88.3%)         | 30<br>(69.8%) | 18<br>(41.9%) | 11<br>(25.6%)       | 1<br>(2.3%)   | 1<br>(2.3%) | 8<br>(18.6%)        | 8<br>(18.6%)  | 3<br>(7.0%)               |                     |  |
| p-value <sup>5</sup>                                                                                             | 0.47            | 0.65                | 0.36        | 0.63          | < 0.0001            | < 0.0001       | < 0.0001       | 0.016                 | 0.62          | 0.62          | 0.49                | 0.0003        | 0.59        | 0.87                | 0.66          | < 0.0001                  |                     |  |
| Mean ± standard error of the mean of parametre in faecal samples                                                 |                 |                     |             |               |                     |                |                |                       |               |               |                     |               |             |                     |               |                           |                     |  |
|                                                                                                                  | epg             | Proportion (%) Tela |             |               | Proportion (%) Haem |                |                | Proportion (%) Tricho |               |               | Proportion (%) Chab |               |             | Proportion (%) Coop |               |                           | Proportion (%) Buno |  |
| North<br>(n = 87)                                                                                                | 301 ± 23        | 63.3 ± 0.9          |             |               | 31.9 ± 0.9          |                |                | 3.0 ± 0.2             |               |               | 1.0 ± 0.1           |               |             | 0.6 ± 0.1           |               |                           | 0.1 ± 0.1           |  |
| Central<br>(n = 127)                                                                                             | 190 ± 16        | 59.2 ± 1.6          |             |               | 30.0 ± 1.1          |                |                | 2.4 ± 0.2             |               |               | 0.9 ± 0.1           |               |             | 0.6 ± 0.1           |               |                           | 0.2 ± 0.0           |  |
| South<br>(n = 68)                                                                                                | 311 ± 47        | 51.2 ± 3.4          |             |               | 24.0 ± 1.8          |                |                | 2.1 ± 0.3             |               |               | 0.8 ± 0.1           |               |             | 0.5 ± 0.1           |               |                           | 0.1 ± 0.1           |  |
| Islands<br>(n = 43)                                                                                              | 177 ± 18        | 61.8 ± 1.9          |             |               | 31.6 ± 1.4          |                |                | 2.6 ± 0.4             |               |               | 0.9 ± 0.1           |               |             | 0.6 ± 0.1           |               |                           | 0.3 ± 0.1           |  |
| p-value                                                                                                          | 0.0007          | 0.02                |             |               | 0.001               |                |                | 0.13                  |               |               | 0.67                |               |             | 0.81                |               |                           | 0.83                |  |
| Treated flocks                                                                                                   |                 |                     |             |               |                     |                |                |                       |               |               |                     |               |             |                     |               |                           |                     |  |
| Frequency (proportion) of flocks in which presence of parasitic elements of the following helminths was detected |                 |                     |             |               |                     |                |                |                       |               |               |                     |               |             |                     |               |                           |                     |  |
|                                                                                                                  | Dicr            | Fasc                | Para        | Moni          | Tr/idae             | Tela           | Haem           | Tricho                | Chab          | Coop          | Buno                | Nema          | Stro        | Trichu              | Lung          | epg <sup>2</sup><br>> 300 |                     |  |
| North<br>(n = 3)                                                                                                 | 0<br>(0.0%)     | 0<br>(0.0%)         | 0<br>(0.0%) | 1<br>(33.3%)  | 3<br>(100.0%)       | 3<br>(100.0%)  | 3<br>(100.0%)  | 3<br>(100.0%)         | 3<br>(100.0%) | 3<br>(100.0%) | 0<br>(0.0%)         | 0<br>(0.0%)   | 0<br>(0.0%) | 0<br>(0.0%)         | 1<br>(33.3%)  | 0<br>(0.0%)               |                     |  |
| Central <sup>3</sup><br>(n = 22)                                                                                 | 2<br>(9.1%)     | 0<br>(0.0%)         | 0<br>(0.0%) | 5<br>(22.7%)  | 6<br>(27.3%)        | 6<br>(27.3%)   | 6<br>(27.3%)   | 4<br>(18.2%)          | 3<br>(13.6%)  | 4<br>(18.2%)  | 0<br>(0.0%)         | 4<br>(18.2%)  | 2<br>(9.1%) | 2<br>(9.1%)         | 2<br>(9.1%)   | 0<br>(0.0%)               |                     |  |
| South<br>(n = 21)                                                                                                | 3<br>(14.3%)    | 1<br>(4.8%)         | 2<br>(9.5%) | 2<br>(9.5%)   | 8<br>(38.1%)        | 8<br>(38.1%)   | 8<br>(38.1%)   | 7<br>(33.3%)          | 6<br>(28.6%)  | 2<br>(9.5%)   | 1<br>(4.8%)         | 2<br>(9.5%)   | 2<br>(9.5%) | 2<br>(9.5%)         | 1<br>(4.8%)   | 0<br>(0.0%)               |                     |  |

|                                                                  |          |                     |                     |                       |                     |                     |                     |       |       |       |      |      |      |      |      |     |
|------------------------------------------------------------------|----------|---------------------|---------------------|-----------------------|---------------------|---------------------|---------------------|-------|-------|-------|------|------|------|------|------|-----|
| Islands<br>( <i>n</i> = 0)                                       | n/a      | n/a                 | n/a                 | n/a                   | n/a                 | n/a                 | n/a                 | n/a   | n/a   | n/a   | n/a  | n/a  | n/a  | n/a  | n/a  | n/a |
| <i>p</i> -value                                                  | 0.71     | 0.54                | 0.29                | 0.39                  | 0.049               | 0.049               | 0.049               | 0.014 | 0.006 | 0.001 | 0.54 | 0.55 | 0.86 | 0.86 | 0.26 | n/a |
| Mean ± standard error of the mean of parametre in faecal samples |          |                     |                     |                       |                     |                     |                     |       |       |       |      |      |      |      |      |     |
|                                                                  | epg      | Proportion (%) Tela | Proportion (%) Haem | Proportion (%) Tricho | Proportion (%) Chab | Proportion (%) Coop | Proportion (%) Buno |       |       |       |      |      |      |      |      |     |
| North<br>( <i>n</i> = 3)                                         | 163 ± 15 | 54.7 ± 0.8          | 39.3 ± 0.6          | 3.3 ± 0.2             | 1.3 ± 0.1           | 1.3 ± 0.1           | 0.0 ± 0.0           |       |       |       |      |      |      |      |      |     |
| Central<br>( <i>n</i> = 22)                                      | 38 ± 6   | 16.0 ± 2.4          | 10.5 ± 1.6          | 0.5 ± 0.1             | 0.2 ± 0.1           | 0.2 ± 0.1           | 0.0 ± 0.0           |       |       |       |      |      |      |      |      |     |
| South<br>( <i>n</i> = 21)                                        | 30 ± 7   | 24.6 ± 3.9          | 12.1 ± 2.0          | 0.8 ± 0.2             | 0.3 ± 0.1           | 0.1 ± 0.1           | 0.1 ± 0.0           |       |       |       |      |      |      |      |      |     |
| Islands<br>( <i>n</i> = 0)                                       | n/a      | n/a                 | n/a                 | n/a                   | n/a                 | n/a                 | n/a                 |       |       |       |      |      |      |      |      |     |
| <i>p</i> -value                                                  | 0.013    | 0.10                | 0.026               | 0.002                 | 0.005               | 0.002               | 0.56                |       |       |       |      |      |      |      |      |     |

1 Untreated / Treated flocks = Flocks that had not / had received anthelmintics during the two months prior to sampling.

2 Dd = *Dicrocoelium dendriticum*, Fh = *Fasciola hepatica*, Pc = *Paramphistomum cervi*, Mon = *Moniezia* spp., Tric fam = Trichostrongylidae, Tel = *Teladorsagia* spp., Hc = *Haemonchus contortus*, Trich spp. = *Trichostrongylus* spp., Chab = *Chabertia* spp., Coop = *Cooperia* spp., Bun = *Bunostomum* spp., Nem = *Nematodirus* spp., Sp = *Strongyloides papillosus*, Trichur = *Trichuris* spp., Lung = lungworms.

3 Trichostrongylidae eggs per gram.

4 Details of the geographical areas in Table S3 and Figure S1.

5 *p*-value = for comparison between flocks in the four geographical areas.



**Table S7.** Associations of presence of *Dicrocoelium dendriticum* in faecal samples from 279 sheep flocks in Greece, as found in univariable analysis.

| Number of farms                                                                           |                |                       |           |                                                                                               |                |                       |           | <i>p</i> |
|-------------------------------------------------------------------------------------------|----------------|-----------------------|-----------|-----------------------------------------------------------------------------------------------|----------------|-----------------------|-----------|----------|
| Farms with presence of <i>Dicrocoelium dendriticum</i> in faecal samples ( <i>n</i> = 49) |                |                       |           | Farms with no presence of <i>Dicrocoelium dendriticum</i> in faecal samples ( <i>n</i> = 230) |                |                       |           |          |
| Management system applied in the farm                                                     |                |                       |           |                                                                                               |                |                       |           |          |
| Intensive                                                                                 | Semi-intensive | Semi-extensive        | Extensive | Intensive                                                                                     | Semi-intensive | Semi-extensive        | Extensive |          |
| 7                                                                                         | 22             | 16                    | 4         | 29                                                                                            | 106            | 76                    | 19        | 0.99     |
| Years at the present location                                                             |                |                       |           |                                                                                               |                |                       |           |          |
| 0 – 2                                                                                     |                | 3 – 5                 | > 5       | 0 – 2                                                                                         |                | 3 – 5                 | > 5       |          |
| 2                                                                                         |                | 5                     | 42        | 3                                                                                             |                | 25                    | 202       | 0.41     |
| Month into the lactation period at sampling                                               |                |                       |           |                                                                                               |                |                       |           |          |
| 0–1st                                                                                     | 2nd–5th        | 6th–9th               | After 9th | 0–1st                                                                                         | 2nd–5th        | 6th–9th               | After 9th |          |
| 2                                                                                         | 21             | 22                    | 4         | 3                                                                                             | 96             | 119                   | 12        | 0.43     |
| Availability of a main building for animals                                               |                |                       |           |                                                                                               |                |                       |           |          |
| Yes                                                                                       |                |                       | No        | Yes                                                                                           |                |                       | No        |          |
| 46                                                                                        |                |                       | 3         | 226                                                                                           |                |                       | 4         | 0.07     |
| Material of the floor of the barn                                                         |                |                       |           |                                                                                               |                |                       |           |          |
| Soil                                                                                      |                |                       | Other     | Soil                                                                                          |                |                       | Other     |          |
| 47                                                                                        |                |                       | 2         | 205                                                                                           |                |                       | 25        | 0.14     |
| Availability of straw bedding                                                             |                |                       |           |                                                                                               |                |                       |           |          |
| Yes                                                                                       |                |                       | No        | Yes                                                                                           |                |                       | No        |          |
| 39                                                                                        |                |                       | 10        | 188                                                                                           |                |                       | 42        | 0.73     |
| Annual frequency of removal / clean-up of the straw bedding                               |                |                       |           |                                                                                               |                |                       |           |          |
| 1 – 2                                                                                     |                |                       | > 2       | 1 – 2                                                                                         |                |                       | > 2       |          |
| 24                                                                                        |                |                       | 15        | 123                                                                                           |                |                       | 65        | 0.64     |
| Grazing practiced                                                                         |                |                       |           |                                                                                               |                |                       |           |          |
| Yes                                                                                       |                |                       | No        | Yes                                                                                           |                |                       | No        |          |
| 42                                                                                        |                |                       | 7         | 200                                                                                           |                |                       | 30        | 0.82     |
| Grazing land available to animals                                                         |                |                       |           |                                                                                               |                |                       |           |          |
| 0 – 0.5 acre per animal                                                                   |                | > 0.5 acre per animal |           | 0 – 0.5 acre per animal                                                                       |                | > 0.5 acre per animal |           |          |
| 16                                                                                        |                | 33                    |           | 35                                                                                            |                | 195                   |           | 0.004    |
| No. of female animals in the farm                                                         |                |                       |           |                                                                                               |                |                       |           |          |
| 0 – 165                                                                                   | 166 – 330      | 331 – 500             | > 500     | 0 – 165                                                                                       | 166 – 330      | 331 – 500             | > 500     |          |
| 10                                                                                        | 16             | 13                    | 10        | 65                                                                                            | 80             | 47                    | 38        | 0.57     |
| Breed of ewes                                                                             |                |                       |           |                                                                                               |                |                       |           |          |
| Cross-breeds                                                                              | Greek breeds   | Imported breeds       |           | Cross-breeds                                                                                  | Greek breeds   | Imported breeds       |           |          |
| 8                                                                                         | 22             | 19                    |           | 31                                                                                            | 100            | 99                    |           | 0.81     |

|                                                                                     |                     |                |                       |                     |                 |              |                    |
|-------------------------------------------------------------------------------------|---------------------|----------------|-----------------------|---------------------|-----------------|--------------|--------------------|
|                                                                                     |                     |                |                       |                     |                 |              |                    |
| Month of the start of the lambing season                                            |                     |                |                       |                     |                 |              |                    |
| All year<br>1                                                                       | Autumn<br>37        | Winter<br>11   | Spring-Summer<br>0    | All year<br>14      | Autumn<br>173   | Winter<br>38 | Spring-Summer<br>5 |
| 0.38                                                                                |                     |                |                       |                     |                 |              |                    |
| Collaboration with a veterinarian                                                   |                     |                |                       |                     |                 |              |                    |
| Yes<br>44                                                                           |                     |                | No<br>5               | Yes<br>190          |                 |              | No<br>40           |
| 0.21                                                                                |                     |                |                       |                     |                 |              |                    |
| Use of laboratory diagnostic examinations in faecal samples preventively            |                     |                |                       |                     |                 |              |                    |
| Yes<br>2                                                                            |                     |                | No<br>47              | Yes<br>20           |                 |              | No<br>210          |
| 0.28                                                                                |                     |                |                       |                     |                 |              |                    |
| Total visits made annually by veterinarians to the farm during the preceding season |                     |                |                       |                     |                 |              |                    |
| 0 – 4<br>22                                                                         | 5 – 7<br>13         | > 7<br>14      | 0 – 4<br>101          | 5 – 7<br>59         | > 7<br>70       |              |                    |
| 0.97                                                                                |                     |                |                       |                     |                 |              |                    |
| Application of reproductive control practices in the farm                           |                     |                |                       |                     |                 |              |                    |
| Yes<br>14                                                                           |                     |                | No<br>35              | Yes<br>62           |                 |              | No<br>168          |
| 0.82                                                                                |                     |                |                       |                     |                 |              |                    |
| Nutritional modifications before the lambing period                                 |                     |                |                       |                     |                 |              |                    |
| Yes<br>31                                                                           |                     |                | No<br>18              | Yes<br>162          |                 |              | No<br>68           |
| 0.32                                                                                |                     |                |                       |                     |                 |              |                    |
| Age of lamb removal from their dams                                                 |                     |                |                       |                     |                 |              |                    |
| ≤ 40 days<br>18                                                                     | 41 – 60 days<br>24  | > 60 days<br>7 | ≤ 40 days<br>81       | 41 – 60 days<br>124 | > 60 days<br>25 |              |                    |
| 0.73                                                                                |                     |                |                       |                     |                 |              |                    |
| Seasonal transfer of animals to other site                                          |                     |                |                       |                     |                 |              |                    |
| Yes<br>13                                                                           |                     |                | No<br>36              | Yes<br>34           |                 |              | No<br>196          |
| 0.046                                                                               |                     |                |                       |                     |                 |              |                    |
| Annual frequency of systemic disinfections in the farm                              |                     |                |                       |                     |                 |              |                    |
| 0 – 9<br>42                                                                         |                     |                | > 9<br>7              | 0 – 9<br>209        | > 9<br>21       |              |                    |
| 0.28                                                                                |                     |                |                       |                     |                 |              |                    |
| Shearing of animals                                                                 |                     |                |                       |                     |                 |              |                    |
| Yes<br>48                                                                           |                     |                | No<br>1               | Yes<br>227          |                 |              | No<br>3            |
| 0.69                                                                                |                     |                |                       |                     |                 |              |                    |
| Provision of finished feed (concentrate) to animals throughout the year             |                     |                |                       |                     |                 |              |                    |
| Yes<br>46                                                                           |                     |                | No<br>3               | Yes<br>214          |                 |              | No<br>16           |
| 0.83                                                                                |                     |                |                       |                     |                 |              |                    |
| Age of farmers                                                                      |                     |                |                       |                     |                 |              |                    |
| Up to 50 years<br>32                                                                | Over 50 years<br>17 |                | Up to 50 years<br>134 | Over 50 years<br>96 |                 |              |                    |
| 0.36                                                                                |                     |                |                       |                     |                 |              |                    |

|                                                            |                                       |                    |                   |                                       |                    |
|------------------------------------------------------------|---------------------------------------|--------------------|-------------------|---------------------------------------|--------------------|
|                                                            |                                       |                    |                   |                                       |                    |
|                                                            |                                       |                    |                   |                                       |                    |
| Length of previous animal farming experience of the farmer |                                       |                    |                   |                                       |                    |
| ≤ 5 years                                                  | > 5 years                             | ≤ 5 years          | > 5 years         |                                       |                    |
| 7                                                          | 42                                    | 49                 | 181               |                                       | 0.27               |
|                                                            |                                       |                    |                   |                                       |                    |
| Education of the farmer                                    |                                       |                    |                   |                                       |                    |
| Primary education                                          | Secondary or post-secondary education | Tertiary education | Primary education | Secondary or post-secondary education | Tertiary education |
| 6                                                          | 39                                    | 4                  | 40                | 156                                   | 34                 |
|                                                            |                                       |                    |                   |                                       |                    |
| Professional involvement in farming                        |                                       |                    |                   |                                       |                    |
| Full-time                                                  | Part-time                             | Full-time          | Part-time         |                                       |                    |
| 45                                                         | 4                                     | 204                | 26                |                                       | 0.52               |
|                                                            |                                       |                    |                   |                                       |                    |
| Presence of working staff in the flock                     |                                       |                    |                   |                                       |                    |
| Yes                                                        | No                                    | Yes                | No                |                                       |                    |
| 16                                                         | 33                                    | 86                 | 144               |                                       | 0.53               |

**Table S8.** Associations of high (> 300) epg counts in faecal samples from 279 sheep flocks in Greece, as found in univariable analysis.

| Number of farms                                                       |                |                       |           |                                                                       |                |                       |           | <i>p</i> |
|-----------------------------------------------------------------------|----------------|-----------------------|-----------|-----------------------------------------------------------------------|----------------|-----------------------|-----------|----------|
| Farms with high (> 300) epg counts in faecal samples ( <i>n</i> = 66) |                |                       |           | Farms with low (≤ 300) epg counts in faecal samples ( <i>n</i> = 213) |                |                       |           |          |
| Management system applied in the farm                                 |                |                       |           |                                                                       |                |                       |           |          |
| Intensive                                                             | Semi-intensive | Semi-extensive        | Extensive | Intensive                                                             | Semi-intensive | Semi-extensive        | Extensive |          |
| 10                                                                    | 27             | 23                    | 6         | 26                                                                    | 101            | 69                    | 17        | 0.81     |
| Years at the present location                                         |                |                       |           |                                                                       |                |                       |           |          |
| 0 – 2                                                                 | 3 – 5          |                       | > 5       | 0 – 2                                                                 | 3 – 5          |                       | > 5       |          |
| 0                                                                     | 9              |                       | 57        | 5                                                                     | 20             |                       | 188       | 0.29     |
| Month into the lactation period at sampling                           |                |                       |           |                                                                       |                |                       |           |          |
| 0–1st                                                                 | 2nd–5th        | 6th–9th               | After 9th | 0–1st                                                                 | 2nd–5th        | 6th–9th               | After 9th |          |
| 0                                                                     | 19             | 39                    | 8         | 5                                                                     | 98             | 102                   | 8         | 0.006    |
| Availability of a main building for animals                           |                |                       |           |                                                                       |                |                       |           |          |
| Yes                                                                   |                |                       | No        | Yes                                                                   |                |                       | No        |          |
| 65                                                                    |                |                       | 1         | 207                                                                   |                |                       | 6         | 0.55     |
| Material of the floor of the barn                                     |                |                       |           |                                                                       |                |                       |           |          |
| Soil                                                                  |                |                       | Other     | Soil                                                                  |                |                       | Other     |          |
| 57                                                                    |                |                       | 9         | 195                                                                   |                |                       | 18        | 0.21     |
| Availability of straw bedding                                         |                |                       |           |                                                                       |                |                       |           |          |
| Yes                                                                   |                |                       | No        | Yes                                                                   |                |                       | No        |          |
| 50                                                                    |                |                       | 16        | 177                                                                   |                |                       | 36        | 0.18     |
| Annual frequency of removal / clean-up of the straw bedding           |                |                       |           |                                                                       |                |                       |           |          |
| 1 – 2                                                                 |                |                       | > 2       | 1 – 2                                                                 |                |                       | > 2       |          |
| 30                                                                    |                |                       | 20        | 117                                                                   |                |                       | 60        | 0.43     |
| Grazing practiced                                                     |                |                       |           |                                                                       |                |                       |           |          |
| Yes                                                                   |                |                       | No        | Yes                                                                   |                |                       | No        |          |
| 55                                                                    |                |                       | 11        | 187                                                                   |                |                       | 26        | 0.35     |
| Grazing land available to animals                                     |                |                       |           |                                                                       |                |                       |           |          |
| 0 – 0.5 acre per animal                                               |                | > 0.5 acre per animal |           | 0 – 0.5 acre per animal                                               |                | > 0.5 acre per animal |           |          |
| 22                                                                    |                | 44                    |           | 76                                                                    |                | 137                   |           | 0.73     |
| No. of female animals in the farm                                     |                |                       |           |                                                                       |                |                       |           |          |
| 0 – 165                                                               | 166 – 330      | 331 – 500             | > 500     | 0 – 165                                                               | 166 – 330      | 331 – 500             | > 500     |          |
| 25                                                                    | 19             | 11                    | 11        | 50                                                                    | 77             | 49                    | 37        | 0.13     |
| Breed of ewes                                                         |                |                       |           |                                                                       |                |                       |           |          |
| Cross-breeds                                                          | Greek breeds   | Imported breeds       |           | Cross-breeds                                                          | Greek breeds   | Imported breeds       |           |          |
| 10                                                                    | 27             | 29                    |           | 29                                                                    | 95             | 89                    |           | 0.86     |



|                                                            |                                       |                    |                   |                                       |                    |
|------------------------------------------------------------|---------------------------------------|--------------------|-------------------|---------------------------------------|--------------------|
|                                                            |                                       |                    |                   |                                       |                    |
| Length of previous animal farming experience of the farmer |                                       |                    |                   |                                       |                    |
| ≤ 5 years                                                  |                                       | > 5 years          | ≤ 5 years         | > 5 years                             |                    |
| 14                                                         |                                       | 52                 | 42                | 171                                   | 0.79               |
| Education of the farmer                                    |                                       |                    |                   |                                       |                    |
| Primary education                                          | Secondary or post-secondary education | Tertiary education | Primary education | Secondary or post-secondary education | Tertiary education |
| 16                                                         | 42                                    | 8                  | 30                | 153                                   | 30                 |
| Professional involvement in farming                        |                                       |                    |                   |                                       |                    |
| Full-time                                                  |                                       | Part-time          | Full-time         | Part-time                             |                    |
| 62                                                         |                                       | 4                  | 187               | 26                                    | 0.16               |
| Presence of working staff in the flock                     |                                       |                    |                   |                                       |                    |
| Yes                                                        |                                       | No                 | Yes               | No                                    |                    |
| 24                                                         |                                       | 42                 | 78                | 135                                   | 0.97               |

**Table S9.** Associations of high proportion (> 63%) of *Teladorsagia* spp. among Trichostrongylidae helminths in faecal samples from 279 sheep flocks in Greece, as found in univariable analysis.

| Number of farms                                                                                                                      |                               |                       |                             |                                                                                                                                      |                               |                       |                              | <i>p</i> |
|--------------------------------------------------------------------------------------------------------------------------------------|-------------------------------|-----------------------|-----------------------------|--------------------------------------------------------------------------------------------------------------------------------------|-------------------------------|-----------------------|------------------------------|----------|
| Farms with high proportion (> 63%) of <i>Teladorsagia</i> spp. among Trichostrongylidae helminths in faecal samples ( <i>n</i> = 94) |                               |                       |                             | Farms with low proportion (≤ 63%) of <i>Teladorsagia</i> spp. among Trichostrongylidae helminths in faecal samples ( <i>n</i> = 185) |                               |                       |                              |          |
| Management system applied in the farm                                                                                                |                               |                       |                             |                                                                                                                                      |                               |                       |                              |          |
| Intensive<br>8                                                                                                                       | Semi-intensive<br>42          | Semi-extensive<br>34  | Extensive<br>10             | Intensive<br>28                                                                                                                      | Semi-intensive<br>86          | Semi-extensive<br>58  | Extensive<br>13              | 0.31     |
| Years at the present location                                                                                                        |                               |                       |                             |                                                                                                                                      |                               |                       |                              |          |
| 0 – 2<br>2                                                                                                                           |                               | 3 – 5<br>8            | > 5<br>84                   | 0 – 2<br>3                                                                                                                           |                               | 3 – 5<br>22           | > 5<br>160                   | 0.67     |
| Month into the lactation period at sampling                                                                                          |                               |                       |                             |                                                                                                                                      |                               |                       |                              |          |
| 0–1st<br>1                                                                                                                           | 2nd–5th<br>43                 | 6th–9th<br>45         | After 9th<br>5              | 0–1st<br>4                                                                                                                           | 2nd–5th<br>74                 | 6th–9th<br>96         | After 9th<br>11              | 0.76     |
| Availability of a main building for animals                                                                                          |                               |                       |                             |                                                                                                                                      |                               |                       |                              |          |
|                                                                                                                                      | Yes<br>93                     |                       | No<br>1                     |                                                                                                                                      | Yes<br>179                    |                       | No<br>6                      | 0.27     |
| Material of the floor of the barn                                                                                                    |                               |                       |                             |                                                                                                                                      |                               |                       |                              |          |
|                                                                                                                                      | Soil<br>82                    |                       | Other<br>12                 |                                                                                                                                      | Soil<br>170                   |                       | Other<br>15                  | 0.21     |
| Availability of straw bedding                                                                                                        |                               |                       |                             |                                                                                                                                      |                               |                       |                              |          |
|                                                                                                                                      | Yes<br>70                     |                       | No<br>24                    |                                                                                                                                      | Yes<br>157                    |                       | No<br>28                     | 0.035    |
| Annual frequency of removal / clean-up of the straw bedding                                                                          |                               |                       |                             |                                                                                                                                      |                               |                       |                              |          |
|                                                                                                                                      | 1 – 2<br>46                   |                       | > 2<br>24                   |                                                                                                                                      | 1 – 2<br>101                  |                       | > 2<br>56                    | 0.84     |
| Grazing practiced                                                                                                                    |                               |                       |                             |                                                                                                                                      |                               |                       |                              |          |
|                                                                                                                                      | Yes<br>86                     |                       | No<br>8                     |                                                                                                                                      | Yes<br>156                    |                       | No<br>29                     | 0.10     |
| Grazing land available to animals                                                                                                    |                               |                       |                             |                                                                                                                                      |                               |                       |                              |          |
|                                                                                                                                      | 0 – 0.5 acre per animal<br>29 |                       | > 0.5 acre per animal<br>65 |                                                                                                                                      | 0 – 0.5 acre per animal<br>69 |                       | > 0.5 acre per animal<br>116 | 0.29     |
| No. of female animals in the farm                                                                                                    |                               |                       |                             |                                                                                                                                      |                               |                       |                              |          |
| 0 – 165<br>24                                                                                                                        | 166 – 330<br>35               | 331 – 500<br>21       | > 500<br>14                 | 0 – 165<br>51                                                                                                                        | 166 – 330<br>61               | 331 – 500<br>39       | > 500<br>34                  | 0.82     |
| Breed of ewes                                                                                                                        |                               |                       |                             |                                                                                                                                      |                               |                       |                              |          |
| Cross-breeds<br>18                                                                                                                   | Greek breeds<br>41            | Imported breeds<br>35 |                             | Cross-breeds<br>21                                                                                                                   | Greek breeds<br>81            | Imported breeds<br>83 |                              | 0.17     |

|                                                                                     |              |               |               |                |              |               |               |       |
|-------------------------------------------------------------------------------------|--------------|---------------|---------------|----------------|--------------|---------------|---------------|-------|
|                                                                                     |              |               |               |                |              |               |               |       |
| Month of the start of the lambing season                                            |              |               |               |                |              |               |               |       |
| All year                                                                            | Autumn       | Winter        | Spring-Summer | All year       | Autumn       | Winter        | Spring-Summer |       |
| 5                                                                                   | 70           | 17            | 2             | 10             | 140          | 32            | 3             | 0.99  |
| Collaboration with a veterinarian                                                   |              |               |               |                |              |               |               |       |
| Yes                                                                                 |              |               | No            | Yes            |              |               | No            |       |
| 76                                                                                  |              |               | 18            | 158            |              |               | 27            | 0.33  |
| Use of laboratory diagnostic examinations in faecal samples preventively            |              |               |               |                |              |               |               |       |
| Yes                                                                                 |              |               | No            | Yes            |              |               | No            |       |
| 6                                                                                   |              |               | 88            | 16             |              |               | 169           | 0.51  |
| Total visits made annually by veterinarians to the farm during the preceding season |              |               |               |                |              |               |               |       |
| 0 – 4                                                                               | 5 – 7        |               | > 7           | 0 – 4          | 5 – 7        |               | > 7           |       |
| 42                                                                                  | 29           |               | 23            | 81             | 43           |               | 61            | 0.23  |
| Application of reproductive control practices in the farm                           |              |               |               |                |              |               |               |       |
| Yes                                                                                 |              |               | No            | Yes            |              |               | No            |       |
| 28                                                                                  |              |               | 67            | 49             |              |               | 136           | 0.60  |
| Nutritional modifications before the lambing period                                 |              |               |               |                |              |               |               |       |
| Yes                                                                                 |              |               | No            | Yes            |              |               | No            |       |
| 59                                                                                  |              |               | 35            | 134            |              |               | 51            | 0.10  |
| Age of lamb removal from their dams                                                 |              |               |               |                |              |               |               |       |
| ≤ 40 days                                                                           | 41 – 60 days |               | > 60 days     | ≤ 40 days      | 41 – 60 days |               | > 60 days     |       |
| 27                                                                                  | 56           |               | 11            | 72             | 92           |               | 21            | 0.23  |
| Seasonal transfer of animals to other site                                          |              |               |               |                |              |               |               |       |
| Yes                                                                                 |              |               | No            | Yes            |              |               | No            |       |
| 19                                                                                  |              |               | 94            | 28             |              |               | 157           | 0.70  |
| Annual frequency of systemic disinfections in the farm                              |              |               |               |                |              |               |               |       |
| 0 – 9                                                                               |              |               | > 9           | 0 – 9          |              |               | > 9           |       |
| 86                                                                                  |              |               | 8             | 165            |              |               | 20            | 0.55  |
| Shearing of animals                                                                 |              |               |               |                |              |               |               |       |
| Yes                                                                                 |              |               | No            | Yes            |              |               | No            |       |
| 94                                                                                  |              |               | 0             | 181            |              |               | 4             | 0.15  |
| Provision of finished feed (concentrate) to animals throughout the year             |              |               |               |                |              |               |               |       |
| Yes                                                                                 |              |               | No            | Yes            |              |               | No            |       |
| 85                                                                                  |              |               | 9             | 175            |              |               | 10            | 0.19  |
| Age of farmers                                                                      |              |               |               |                |              |               |               |       |
| Up to 50 years                                                                      |              | Over 50 years |               | Up to 50 years |              | Over 50 years |               |       |
| 65                                                                                  |              | 29            |               | 102            |              | 83            |               | 0.024 |



|                                                            |                                       |                    |                   |                                       |                    |
|------------------------------------------------------------|---------------------------------------|--------------------|-------------------|---------------------------------------|--------------------|
|                                                            |                                       |                    |                   |                                       |                    |
| Length of previous animal farming experience of the farmer |                                       |                    |                   |                                       |                    |
| ≤ 5 years                                                  |                                       | > 5 years          | ≤ 5 years         | > 5 years                             |                    |
| 17                                                         |                                       | 77                 | 39                | 146                                   | 0.55               |
| Education of the farmer                                    |                                       |                    |                   |                                       |                    |
| Primary education                                          | Secondary or post-secondary education | Tertiary education | Primary education | Secondary or post-secondary education | Tertiary education |
| 18                                                         | 65                                    | 11                 | 28                | 130                                   | 27                 |
|                                                            |                                       |                    |                   |                                       | 0.61               |
| Professional involvement in farming                        |                                       |                    |                   |                                       |                    |
| Full-time                                                  |                                       | Part-time          | Full-time         | Part-time                             |                    |
| 83                                                         |                                       | 11                 | 166               | 19                                    | 0.72               |
| Presence of working staff in the flock                     |                                       |                    |                   |                                       |                    |
| Yes                                                        |                                       | No                 | Yes               | No                                    |                    |
| 30                                                         |                                       | 64                 | 72                | 113                                   | 0.25               |

**Table S10.** Associations of high proportion (> 29%) of *Haemonchus contortus* among Trichostrongylidae helminths in faecal samples from 279 sheep flocks in Greece, as found in univariable analysis.

| Number of farms                                                                                                                 |                               |                       |                             |                                                                                                                                |                               |                       |                             | <i>p</i> |
|---------------------------------------------------------------------------------------------------------------------------------|-------------------------------|-----------------------|-----------------------------|--------------------------------------------------------------------------------------------------------------------------------|-------------------------------|-----------------------|-----------------------------|----------|
| Farms with high propotion (> 29%) of <i>H. contortus</i> among Trichostrongylidae helminths in faecal samples ( <i>n</i> = 160) |                               |                       |                             | Farms with low propotion (≤ 29%) of <i>H. contortus</i> among Trichostrongylidae helminths in faecal samples ( <i>n</i> = 119) |                               |                       |                             |          |
| Management system applied in the farm                                                                                           |                               |                       |                             |                                                                                                                                |                               |                       |                             |          |
| Intensive<br>24                                                                                                                 | Semi-intensive<br>78          | Semi-extensive<br>47  | Extensive<br>11             | Intensive<br>12                                                                                                                | Semi-intensive<br>50          | Semi-extensive<br>45  | Extensive<br>12             | 0.23     |
| Years at the present location                                                                                                   |                               |                       |                             |                                                                                                                                |                               |                       |                             |          |
| 0 – 2<br>3                                                                                                                      |                               | 3 – 5<br>18           | > 5<br>139                  | 0 – 2<br>2                                                                                                                     |                               | 3 – 5<br>12           | > 5<br>105                  | 0.94     |
| Month into the lactation period at sampling                                                                                     |                               |                       |                             |                                                                                                                                |                               |                       |                             |          |
| 0–1st<br>4                                                                                                                      | 2nd–5th<br>58                 | 6th–9th<br>89         | After 9th<br>9              | 0–1st<br>1                                                                                                                     | 2nd–5th<br>59                 | 6th–9th<br>52         | After 9th<br>7              | 0.12     |
| Availability of a main building for animals                                                                                     |                               |                       |                             |                                                                                                                                |                               |                       |                             |          |
|                                                                                                                                 | Yes<br>154                    |                       | No<br>6                     |                                                                                                                                | Yes<br>118                    |                       | No<br>1                     | 0.12     |
| Material of the floor of the barn                                                                                               |                               |                       |                             |                                                                                                                                |                               |                       |                             |          |
|                                                                                                                                 | Soil<br>145                   |                       | Other<br>15                 |                                                                                                                                | Soil<br>107                   |                       | Other<br>12                 | 0.84     |
| Availability of straw bedding                                                                                                   |                               |                       |                             |                                                                                                                                |                               |                       |                             |          |
|                                                                                                                                 | Yes<br>136                    |                       | No<br>24                    |                                                                                                                                | Yes<br>91                     |                       | No<br>28                    | 0.070    |
| Annual frequency of removal / clean-up of the straw bedding                                                                     |                               |                       |                             |                                                                                                                                |                               |                       |                             |          |
|                                                                                                                                 | 1 – 2<br>86                   |                       | > 2<br>50                   |                                                                                                                                | 1 – 2<br>61                   |                       | > 2<br>30                   | 0.56     |
| Grazing practiced                                                                                                               |                               |                       |                             |                                                                                                                                |                               |                       |                             |          |
|                                                                                                                                 | Yes<br>134                    |                       | No<br>26                    |                                                                                                                                | Yes<br>108                    |                       | No<br>11                    | 0.09     |
| Grazing land available to animals                                                                                               |                               |                       |                             |                                                                                                                                |                               |                       |                             |          |
|                                                                                                                                 | 0 – 0.5 acre per animal<br>62 |                       | > 0.5 acre per animal<br>98 |                                                                                                                                | 0 – 0.5 acre per animal<br>36 |                       | > 0.5 acre per animal<br>83 | 0.14     |
| No. of female animals in the farm                                                                                               |                               |                       |                             |                                                                                                                                |                               |                       |                             |          |
| 0 – 165<br>47                                                                                                                   | 166 – 330<br>47               | 331 – 500<br>36       | > 500<br>30                 | 0 – 165<br>28                                                                                                                  | 166 – 330<br>49               | 331 – 500<br>24       | > 500<br>18                 | 0.23     |
| Breed of ewes                                                                                                                   |                               |                       |                             |                                                                                                                                |                               |                       |                             |          |
| Cross-breeds<br>17                                                                                                              | Greek breeds<br>76            | Imported breeds<br>67 |                             | Cross-breeds<br>22                                                                                                             | Greek breeds<br>46            | Imported breeds<br>51 |                             | 0.12     |

|                                                                                     |                     |                      |                     |                    |                 |              |                    |      |
|-------------------------------------------------------------------------------------|---------------------|----------------------|---------------------|--------------------|-----------------|--------------|--------------------|------|
| Month of the start of the lambing season                                            |                     |                      |                     |                    |                 |              |                    | 0.64 |
| All year<br>9                                                                       | Autumn<br>116       | Winter<br>32         | Spring-Summer<br>3  | All year<br>6      | Autumn<br>94    | Winter<br>17 | Spring-Summer<br>2 |      |
| Collaboration with a veterinarian                                                   |                     |                      |                     |                    |                 |              |                    | 0.36 |
| Yes<br>137                                                                          | No<br>23            | Yes<br>97            | No<br>22            |                    |                 |              |                    |      |
| Use of laboratory diagnostic examinations in faecal samples preventively            |                     |                      |                     |                    |                 |              |                    | 0.24 |
| Yes<br>10                                                                           | No<br>150           | Yes<br>12            | No<br>107           |                    |                 |              |                    |      |
| Total visits made annually by veterinarians to the farm during the preceding season |                     |                      |                     |                    |                 |              |                    | 0.33 |
| 0 – 4<br>70                                                                         | 5 – 7<br>37         | > 7<br>53            | 0 – 4<br>53         | 5 – 7<br>35        | > 7<br>31       |              |                    |      |
| Application of reproductive control practices in the farm                           |                     |                      |                     |                    |                 |              |                    | 0.62 |
| Yes<br>46                                                                           | No<br>114           | Yes<br>31            | No<br>88            |                    |                 |              |                    |      |
| Nutritional modifications before the lambing period                                 |                     |                      |                     |                    |                 |              |                    | 0.16 |
| Yes<br>116                                                                          | No<br>44            | Yes<br>77            | No<br>42            |                    |                 |              |                    |      |
| Age of lamb removal from their dams                                                 |                     |                      |                     |                    |                 |              |                    | 0.64 |
| ≤ 40 days<br>60                                                                     | 41 – 60 days<br>81  | > 60 days<br>19      | ≤ 40 days<br>39     | 41 – 60 days<br>67 | > 60 days<br>13 |              |                    |      |
| Seasonal transfer of animals to other site                                          |                     |                      |                     |                    |                 |              |                    | 0.05 |
| Yes<br>21                                                                           | No<br>139           | Yes<br>26            | No<br>93            |                    |                 |              |                    |      |
| Annual frequency of systemic disinfections in the farm                              |                     |                      |                     |                    |                 |              |                    | 0.24 |
| 0 – 9<br>141                                                                        | > 9<br>19           | 0 – 9<br>110         | > 9<br>9            |                    |                 |              |                    |      |
| Shearing of animals                                                                 |                     |                      |                     |                    |                 |              |                    | 0.47 |
| Yes<br>157                                                                          | No<br>3             | Yes<br>118           | No<br>1             |                    |                 |              |                    |      |
| Provision of finished feed (concentrate) to animals throughout the year             |                     |                      |                     |                    |                 |              |                    | 0.96 |
| Yes<br>149                                                                          | No<br>11            | Yes<br>111           | No<br>8             |                    |                 |              |                    |      |
| Age of farmers                                                                      |                     |                      |                     |                    |                 |              |                    | 0.08 |
| Up to 50 years<br>88                                                                | Over 50 years<br>72 | Up to 50 years<br>78 | Over 50 years<br>41 |                    |                 |              |                    |      |

|                                                            |                                       |                    |                   |                                       |                    |
|------------------------------------------------------------|---------------------------------------|--------------------|-------------------|---------------------------------------|--------------------|
|                                                            |                                       |                    |                   |                                       |                    |
|                                                            |                                       |                    |                   |                                       |                    |
| Length of previous animal farming experience of the farmer |                                       |                    |                   |                                       |                    |
| ≤ 5 years                                                  |                                       | > 5 years          | ≤ 5 years         | > 5 years                             |                    |
| 35                                                         |                                       | 125                | 21                | 98                                    | 0.38               |
| Education of the farmer                                    |                                       |                    |                   |                                       |                    |
| Primary education                                          | Secondary or post-secondary education | Tertiary education | Primary education | Secondary or post-secondary education | Tertiary education |
| 27                                                         | 114                                   | 19                 | 19                | 81                                    | 19                 |
|                                                            |                                       |                    |                   |                                       |                    |
| Professional involvement in farming                        |                                       |                    |                   |                                       |                    |
| Full-time                                                  |                                       | Part-time          | Full-time         | Part-time                             |                    |
| 146                                                        |                                       | 14                 | 103               | 16                                    | 0.21               |
| Presence of working staff in the flock                     |                                       |                    |                   |                                       |                    |
| Yes                                                        |                                       | No                 | Yes               | No                                    |                    |
| 63                                                         |                                       | 97                 | 39                | 80                                    | 0.26               |

**Table S11.** Associations of presence of *Trichuris* spp. in faecal samples from 279 sheep flocks in Greece, as found in univariable analysis.

| Number of farms                                                                 |                |                       |           |                                                                                     |                |                       |           | <i>p</i> |
|---------------------------------------------------------------------------------|----------------|-----------------------|-----------|-------------------------------------------------------------------------------------|----------------|-----------------------|-----------|----------|
| Farms with presence of <i>Trichuris</i> spp. in faecal samples ( <i>n</i> = 61) |                |                       |           | Farms with no presence of <i>Trichuris</i> spp. in faecal samples ( <i>n</i> = 218) |                |                       |           |          |
| Management system applied in the farm                                           |                |                       |           |                                                                                     |                |                       |           |          |
| Intensive                                                                       | Semi-intensive | Semi-extensive        | Extensive | Intensive                                                                           | Semi-intensive | Semi-extensive        | Extensive |          |
| 7                                                                               | 27             | 19                    | 8         | 29                                                                                  | 102            | 72                    | 15        | 0.48     |
| Years at the present location                                                   |                |                       |           |                                                                                     |                |                       |           |          |
| 0 – 2                                                                           | 3 – 5          |                       | > 5       | 0 – 2                                                                               | 3 – 5          |                       | > 5       |          |
| 1                                                                               | 9              |                       | 51        | 3                                                                                   | 21             |                       | 193       | 0.52     |
| Month into the lactation period at sampling                                     |                |                       |           |                                                                                     |                |                       |           |          |
| 0–1st                                                                           | 2nd–5th        | 6th–9th               | After 9th | 0–1st                                                                               | 2nd–5th        | 6th–9th               | After 9th |          |
| 2                                                                               | 25             | 31                    | 3         | 3                                                                                   | 92             | 110                   | 13        | 0.78     |
| Availability of a main building for animals                                     |                |                       |           |                                                                                     |                |                       |           |          |
| Yes                                                                             |                |                       | No        | Yes                                                                                 |                |                       | No        |          |
| 60                                                                              |                |                       | 1         | 212                                                                                 |                |                       | 6         | 0.62     |
| Material of the floor of the barn                                               |                |                       |           |                                                                                     |                |                       |           |          |
| Soil                                                                            |                |                       | Other     | Soil                                                                                |                |                       | Other     |          |
| 53                                                                              |                |                       | 8         | 199                                                                                 |                |                       | 19        | 0.30     |
| Availability of straw bedding                                                   |                |                       |           |                                                                                     |                |                       |           |          |
| Yes                                                                             |                |                       | No        | Yes                                                                                 |                |                       | No        |          |
| 48                                                                              |                |                       | 13        | 179                                                                                 |                |                       | 39        | 0.54     |
| Annual frequency of removal / clean-up of the straw bedding                     |                |                       |           |                                                                                     |                |                       |           |          |
| 1 – 2                                                                           |                |                       | > 2       | 1 – 2                                                                               |                |                       | > 2       |          |
| 32                                                                              |                |                       | 16        | 115                                                                                 |                |                       | 64        | 0.76     |
| Grazing practiced                                                               |                |                       |           |                                                                                     |                |                       |           |          |
| Yes                                                                             |                |                       | No        | Yes                                                                                 |                |                       | No        |          |
| 54                                                                              |                |                       | 7         | 188                                                                                 |                |                       | 30        | 0.64     |
| Grazing land available to animals                                               |                |                       |           |                                                                                     |                |                       |           |          |
| 0 – 0.5 acre per animal                                                         |                | > 0.5 acre per animal |           | 0 – 0.5 acre per animal                                                             |                | > 0.5 acre per animal |           |          |
| 25                                                                              |                | 36                    |           | 73                                                                                  |                | 145                   |           | 0.28     |
| No. of female animals in the farm                                               |                |                       |           |                                                                                     |                |                       |           |          |
| 0 – 165                                                                         | 166 – 330      | 331 – 500             | > 500     | 0 – 165                                                                             | 166 – 330      | 331 – 500             | > 500     |          |
| 24                                                                              | 10             | 15                    | 12        | 50                                                                                  | 87             | 45                    | 36        | 0.005    |
| Breed of ewes                                                                   |                |                       |           |                                                                                     |                |                       |           |          |
| Cross-breeds                                                                    | Greek breeds   | Imported breeds       |           | Cross-breeds                                                                        | Greek breeds   | Imported breeds       |           |          |
| 11                                                                              | 27             | 23                    |           | 28                                                                                  | 95             | 95                    |           | 0.52     |

|                                                                                     |                     |                |                       |                 |                     |                 |                    |       |
|-------------------------------------------------------------------------------------|---------------------|----------------|-----------------------|-----------------|---------------------|-----------------|--------------------|-------|
| Month of the start of the lambing season                                            |                     |                |                       |                 |                     |                 |                    |       |
| All year<br>8                                                                       | Autumn<br>42        | Winter<br>11   | Spring-Summer<br>0    | All year<br>7   | Autumn<br>168       | Winter<br>38    | Spring-Summer<br>5 | 0.015 |
| Collaboration with a veterinarian                                                   |                     |                |                       |                 |                     |                 |                    |       |
| Yes<br>54                                                                           |                     |                | No<br>7               | Yes<br>180      |                     |                 | No<br>38           | 0.26  |
| Use of laboratory diagnostic examinations in faecal samples preventively            |                     |                |                       |                 |                     |                 |                    |       |
| Yes<br>4                                                                            |                     |                | No<br>57              | Yes<br>18       |                     |                 | No<br>200          | 0.66  |
| Total visits made annually by veterinarians to the farm during the preceding season |                     |                |                       |                 |                     |                 |                    |       |
| 0 – 4<br>20                                                                         | 5 – 7<br>19         | > 7<br>22      |                       | 0 – 4<br>103    | 5 – 7<br>53         | > 7<br>62       |                    | 0.13  |
| Application of reproductive control practices in the farm                           |                     |                |                       |                 |                     |                 |                    |       |
| Yes<br>19                                                                           |                     |                | No<br>42              | Yes<br>58       |                     |                 | No<br>160          | 0.48  |
| Nutritional modifications before the lambing period                                 |                     |                |                       |                 |                     |                 |                    |       |
| Yes<br>42                                                                           |                     |                | No<br>19              | Yes<br>151      |                     |                 | No<br>67           | 0.95  |
| Age of lamb removal from their dams                                                 |                     |                |                       |                 |                     |                 |                    |       |
| ≤ 40 days<br>19                                                                     | 41 – 60 days<br>35  | > 60 days<br>7 |                       | ≤ 40 days<br>80 | 41 – 60 days<br>113 | > 60 days<br>25 |                    | 0.71  |
| Seasonal transfer of animals to other site                                          |                     |                |                       |                 |                     |                 |                    |       |
| Yes<br>11                                                                           |                     |                | No<br>50              | Yes<br>36       |                     |                 | No<br>182          | 0.78  |
| Annual frequency of systemic disinfections in the farm                              |                     |                |                       |                 |                     |                 |                    |       |
| 0 – 9<br>52                                                                         |                     |                | > 9<br>9              | 0 – 9<br>199    |                     |                 | > 9<br>19          | 0.17  |
| Shearing of animals                                                                 |                     |                |                       |                 |                     |                 |                    |       |
| Yes<br>61                                                                           |                     |                | No<br>0               | Yes<br>214      |                     |                 | No<br>4            | 0.29  |
| Provision of finished feed (concentrate) to animals throughout the year             |                     |                |                       |                 |                     |                 |                    |       |
| Yes<br>54                                                                           |                     |                | No<br>7               | Yes<br>206      |                     |                 | No<br>12           | 0.10  |
| Age of farmers                                                                      |                     |                |                       |                 |                     |                 |                    |       |
| Up to 50 years<br>43                                                                | Over 50 years<br>18 |                | Up to 50 years<br>123 |                 | Over 50 years<br>95 |                 | 0.048              |       |

|                                                            |                                       |                    |                   |                                       |                    |
|------------------------------------------------------------|---------------------------------------|--------------------|-------------------|---------------------------------------|--------------------|
|                                                            |                                       |                    |                   |                                       |                    |
|                                                            |                                       |                    |                   |                                       |                    |
| Length of previous animal farming experience of the farmer |                                       |                    |                   |                                       |                    |
| ≤ 5 years                                                  |                                       | > 5 years          | ≤ 5 years         | > 5 years                             |                    |
| 14                                                         |                                       | 47                 | 42                | 176                                   | 0.53               |
| Education of the farmer                                    |                                       |                    |                   |                                       |                    |
| Primary education                                          | Secondary or post-secondary education | Tertiary education | Primary education | Secondary or post-secondary education | Tertiary education |
| 15                                                         | 38                                    | 8                  | 31                | 157                                   | 30                 |
|                                                            |                                       |                    |                   |                                       | 0.15               |
| Professional involvement in farming                        |                                       |                    |                   |                                       |                    |
| Full-time                                                  |                                       | Part-time          | Full-time         | Part-time                             |                    |
| 54                                                         |                                       | 7                  | 195               | 23                                    | 0.84               |
| Presence of working staff in the flock                     |                                       |                    |                   |                                       |                    |
| Yes                                                        |                                       | No                 | Yes               | No                                    |                    |
| 26                                                         |                                       | 35                 | 76                | 142                                   | 0.27               |

**Table S12.** Associations of presence of lungworms in faecal samples from 279 sheep flocks in Greece, as found in univariable analysis.

| Number of farms                                                     |                |                       |           |                                                                         |                |                       |           | <i>p</i> |
|---------------------------------------------------------------------|----------------|-----------------------|-----------|-------------------------------------------------------------------------|----------------|-----------------------|-----------|----------|
| Farms with presence of lungworms in faecal samples ( <i>n</i> = 54) |                |                       |           | Farms with no presence of lungworms in faecal samples ( <i>n</i> = 225) |                |                       |           |          |
| Management system applied in the farm                               |                |                       |           |                                                                         |                |                       |           |          |
| Intensive                                                           | Semi-intensive | Semi-extensive        | Extensive | Intensive                                                               | Semi-intensive | Semi-extensive        | Extensive |          |
| 6                                                                   | 26             | 16                    | 6         | 30                                                                      | 102            | 76                    | 17        | 0.77     |
| Years at the present location                                       |                |                       |           |                                                                         |                |                       |           |          |
| 0 – 2                                                               |                | 3 – 5                 | > 5       | 0 – 2                                                                   |                | 3 – 5                 | > 5       |          |
| 1                                                                   |                | 6                     | 47        | 4                                                                       |                | 24                    | 197       | 0.99     |
| Month into the lactation period at sampling                         |                |                       |           |                                                                         |                |                       |           |          |
| 0–1st                                                               | 2nd–5th        | 6th–9th               | After 9th | 0–1st                                                                   | 2nd–5th        | 6th–9th               | After 9th |          |
| 1                                                                   | 24             | 25                    | 4         | 4                                                                       | 93             | 116                   | 12        | 0.88     |
| Availability of a main building for animals                         |                |                       |           |                                                                         |                |                       |           |          |
| Yes                                                                 |                |                       | No        | Yes                                                                     |                |                       | No        |          |
| 54                                                                  |                |                       | 0         | 218                                                                     |                |                       | 7         | 0.19     |
| Material of the floor of the barn                                   |                |                       |           |                                                                         |                |                       |           |          |
| Soil                                                                |                |                       | Other     | Soil                                                                    |                |                       | Other     |          |
| 50                                                                  |                |                       | 4         | 203                                                                     |                |                       | 22        | 0.59     |
| Availability of straw bedding                                       |                |                       |           |                                                                         |                |                       |           |          |
| Yes                                                                 |                |                       | No        | Yes                                                                     |                |                       | No        |          |
| 44                                                                  |                |                       | 10        | 183                                                                     |                |                       | 42        | 0.98     |
| Annual frequency of removal / clean-up of the straw bedding         |                |                       |           |                                                                         |                |                       |           |          |
| 1 – 2                                                               |                |                       | > 2       | 1 – 2                                                                   |                |                       | > 2       |          |
| 32                                                                  |                |                       | 12        | 115                                                                     |                |                       | 68        | 0.22     |
| Grazing practiced                                                   |                |                       |           |                                                                         |                |                       |           |          |
| Yes                                                                 |                |                       | No        | Yes                                                                     |                |                       | No        |          |
| 48                                                                  |                |                       | 6         | 194                                                                     |                |                       | 31        | 0.60     |
| Grazing land available to animals                                   |                |                       |           |                                                                         |                |                       |           |          |
| 0 – 0.5 acre per animal                                             |                | > 0.5 acre per animal |           | 0 – 0.5 acre per animal                                                 |                | > 0.5 acre per animal |           |          |
| 21                                                                  |                | 33                    |           | 77                                                                      |                | 148                   |           | 0.52     |
| No. of female animals in the farm                                   |                |                       |           |                                                                         |                |                       |           |          |
| 0 – 165                                                             | 166 – 330      | 331 – 500             | > 500     | 0 – 165                                                                 | 166 – 330      | 331 – 500             | > 500     |          |
| 16                                                                  | 22             | 11                    | 5         | 59                                                                      | 74             | 49                    | 43        | 0.33     |
| Breed of ewes                                                       |                |                       |           |                                                                         |                |                       |           |          |
| Cross-breeds                                                        | Greek breeds   | Imported breeds       |           | Cross-breeds                                                            | Greek breeds   | Imported breeds       |           |          |
| 7                                                                   | 25             | 22                    |           | 32                                                                      | 97             | 96                    |           | 0.91     |





|                                                            |                                       |                    |                   |                                       |                    |
|------------------------------------------------------------|---------------------------------------|--------------------|-------------------|---------------------------------------|--------------------|
|                                                            |                                       |                    |                   |                                       |                    |
|                                                            |                                       |                    |                   |                                       |                    |
| Length of previous animal farming experience of the farmer |                                       |                    |                   |                                       |                    |
| ≤ 5 years                                                  |                                       | > 5 years          | ≤ 5 years         | > 5 years                             |                    |
| 12                                                         |                                       | 42                 | 44                | 181                                   | 0.66               |
| Education of the farmer                                    |                                       |                    |                   |                                       |                    |
| Primary education                                          | Secondary or post-secondary education | Tertiary education | Primary education | Secondary or post-secondary education | Tertiary education |
| 9                                                          | 39                                    | 6                  | 37                | 156                                   | 32                 |
|                                                            |                                       |                    |                   |                                       |                    |
| Professional involvement in farming                        |                                       |                    |                   |                                       |                    |
| Full-time                                                  |                                       | Part-time          | Full-time         | Part-time                             |                    |
| 51                                                         |                                       | 3                  | 198               | 27                                    | 0.17               |
| Presence of working staff in the flock                     |                                       |                    |                   |                                       |                    |
| Yes                                                        |                                       | No                 | Yes               | No                                    |                    |
| 19                                                         |                                       | 35                 | 83                | 142                                   | 0.82               |
